# Supplementary material for: Is “Esterhazy II”, an Old Walnut Variety in the Hungarian Gene Bank, the Original Genotype?
Source: MDPI journal article supplement (doi:10.3390/plants10050854), 2021-04-23
Supplement: s1 [file s1]

## Supplementary

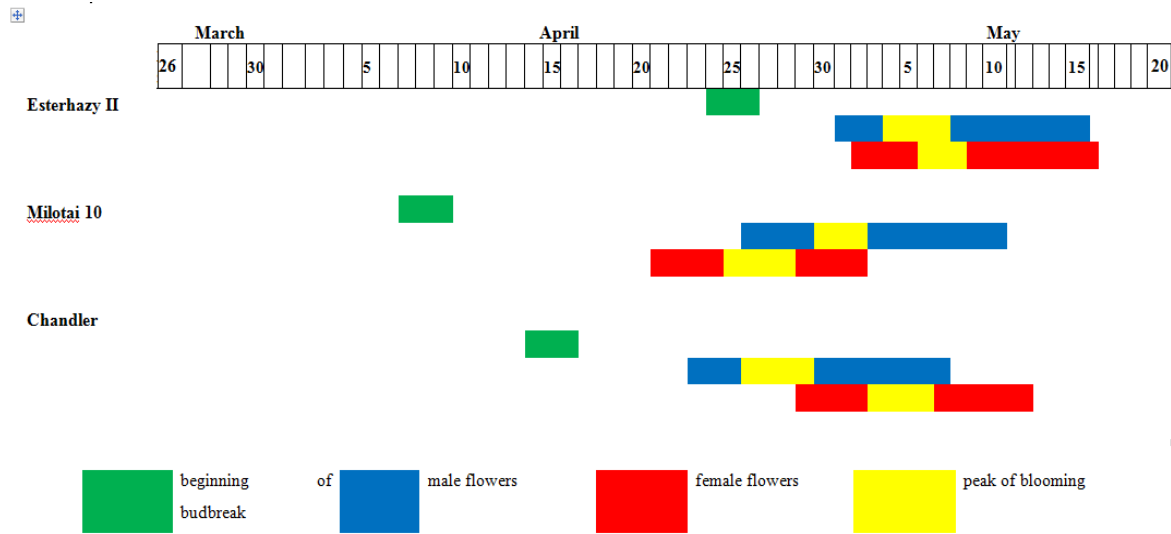

**Figure S1.** related to Table 2. Phenogram of budbreak, pistillate receptivity and pollen shedding period of Esterhazy II in comparison with Milotai 10 and Chandler (2010-2019).

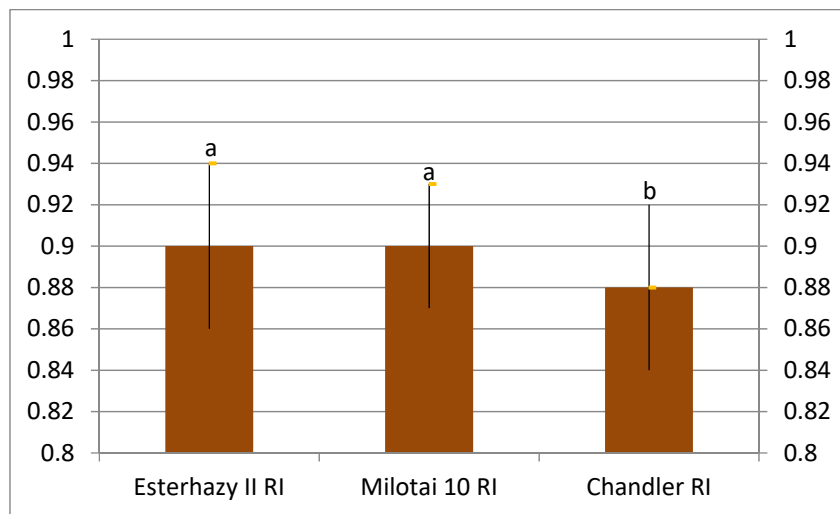

**Figure S2.** Roundness index (RI) of the 'Esterhazy II', 'Milotai 10', and 'Chandler' nuts (2010-2019) (SD<sub>5%</sub> = 0.015).

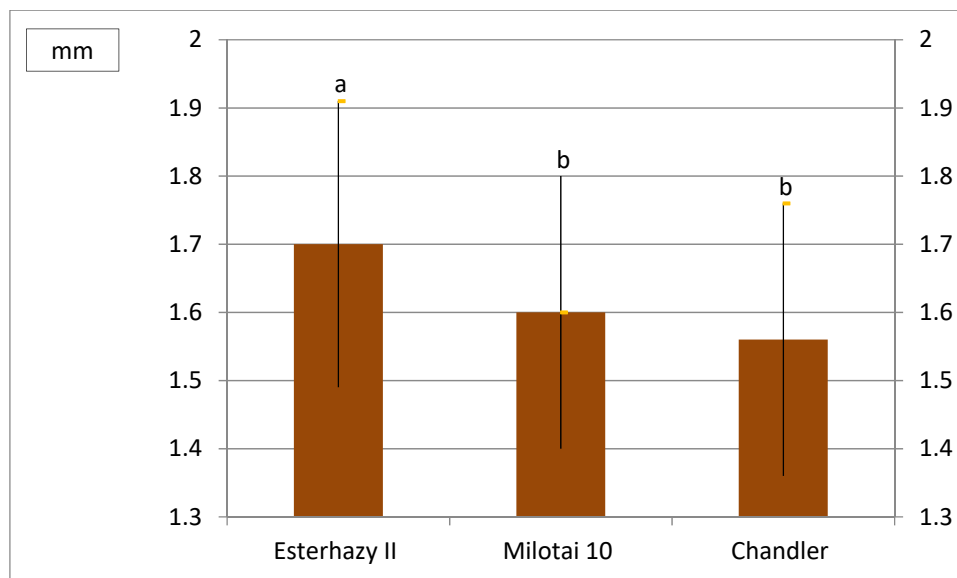

**Figure S3.** Shell thickness of Esterhazy II, Milotai 10 and Chandler (2010-2019) ( $SD_{5\%} = 0.07$ ).

**Table S1.** (Related to Figure 5.) Genetic diversity indices of the analysed 18 *Juglans regia* cultivars applying 8 SSR markers (where N: number of samples,  $N_a$ : number of alleles,  $N_e$ : effective number of alleles, I: Shannon's information index,  $H_o$ : observed heterozygosity,  $H_e$ : expected heterozygosity, F: fixation index).

| SSR Marker | N      | $N_a$ | $N_e$ | I     | $H_o$ | $H_e$ | F      |
|------------|--------|-------|-------|-------|-------|-------|--------|
| WGA27      | 18     | 2     | 1.946 | 0.679 | 0.389 | 0.486 | 0.200  |
| WGA72      | 18     | 2     | 1.314 | 0.403 | 0.278 | 0.239 | -0.161 |
| WGA89      | 18     | 4     | 2.090 | 0.939 | 0.611 | 0.522 | -0.172 |
| WGA118     | 18     | 6     | 2.919 | 1.290 | 0.778 | 0.657 | -0.183 |
| WGA202     | 18     | 9     | 4.101 | 1.703 | 0.667 | 0.756 | 0.118  |
| WGA276     | 18     | 7     | 4.154 | 1.618 | 0.611 | 0.759 | 0.195  |
| JR 6160    | 18     | 3     | 1.573 | 0.655 | 0.333 | 0.364 | 0.085  |
| JR 1817    | 18     | 3     | 1.674 | 0.721 | 0.278 | 0.403 | 0.310  |
| Min        | 18     | 2     | 1.314 | 0.403 | 0.278 | 0.239 | -0.183 |
| Max        | 18     | 9     | 4.154 | 0.721 | 0.778 | 0.759 | 0.310  |
| Mean       | 18.000 | 4.500 | 2.471 | 1.001 | 0.493 | 0.523 | 0.049  |
| SE         | 0.000  | 0.906 | 0.398 | 0.170 | 0.069 | 0.067 | 0.069  |
